# Supplementary material for: Nicardipine Loaded Solid Phospholipid Extrudates for the Prevention of Cerebral Vasospasms: In Vitro Characterization
Source: PubMed Central journal article supplement (PMC7557531; doi:10.3390/pharmaceutics12090817), 2020-08-28
Supplement: pharmaceutics-12-00817-s001.pdf [file pharmaceutics-12-00817-s001.pdf]

# Nicardipine Loaded Solid Phospholipid Extrudates for the Prevention of Cerebral Vasospasms: In Vitro Characterization

Christin Zlomke, Johannes Albrecht and Karsten Mäder

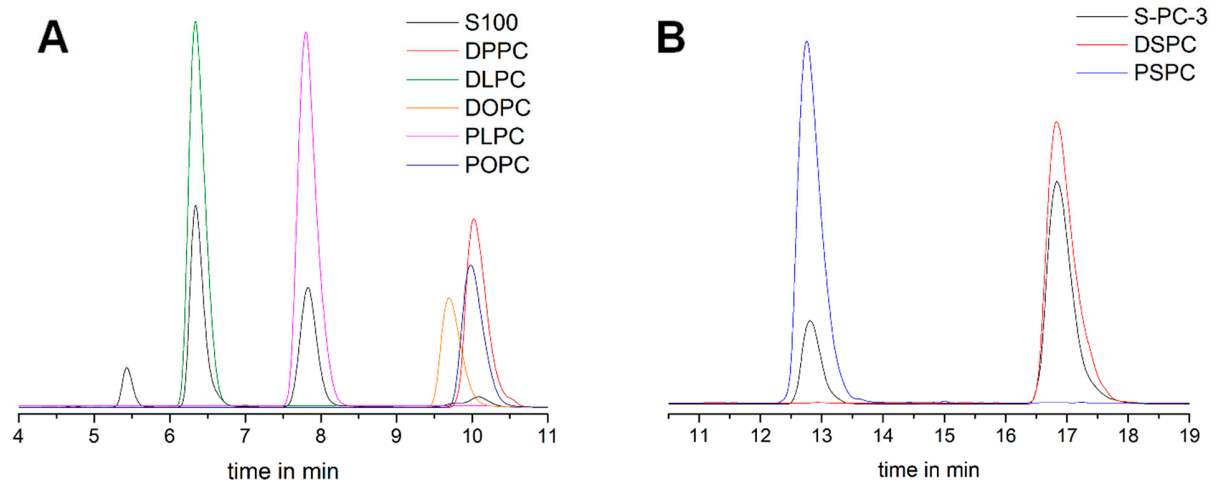

**Figure S1.** HPLC chromatograms of (A) S100 and (B) S-PC-3 each with selected standard PC types.

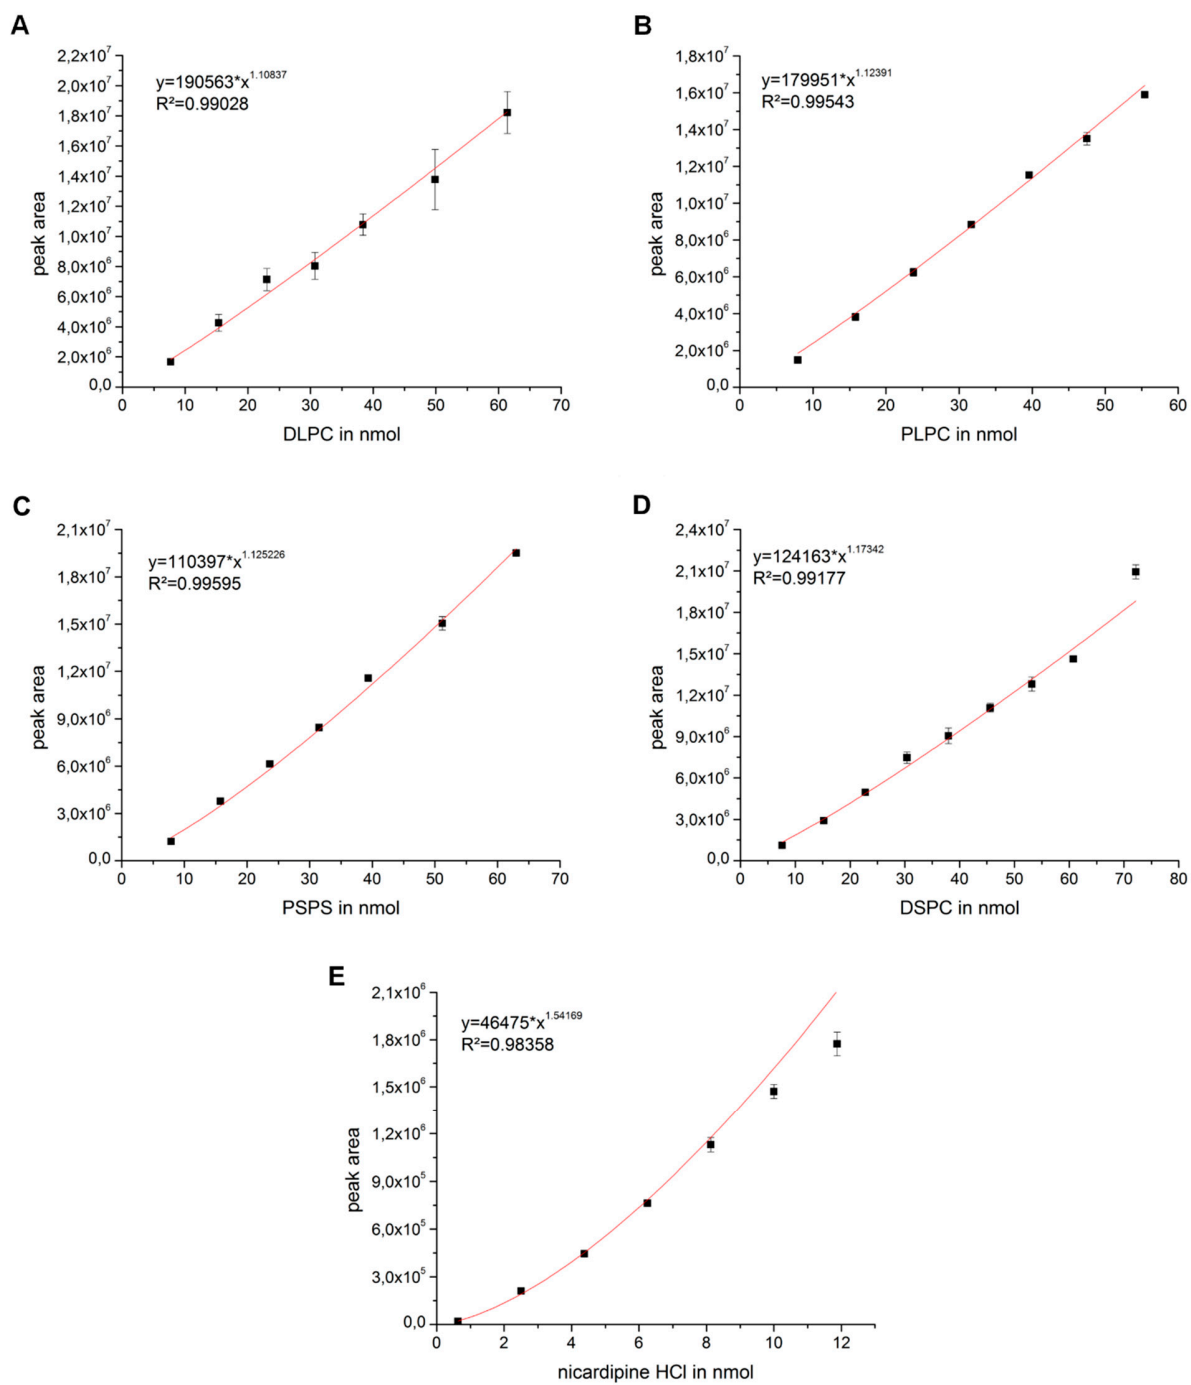

**Figure S1.** ELSD-HPLC calibration curves of phosphatidylcholine standards DLPC (A), PLPC (B), PSPC (C) and DSPC (D) as well as nicardipine hydrochloride (E).

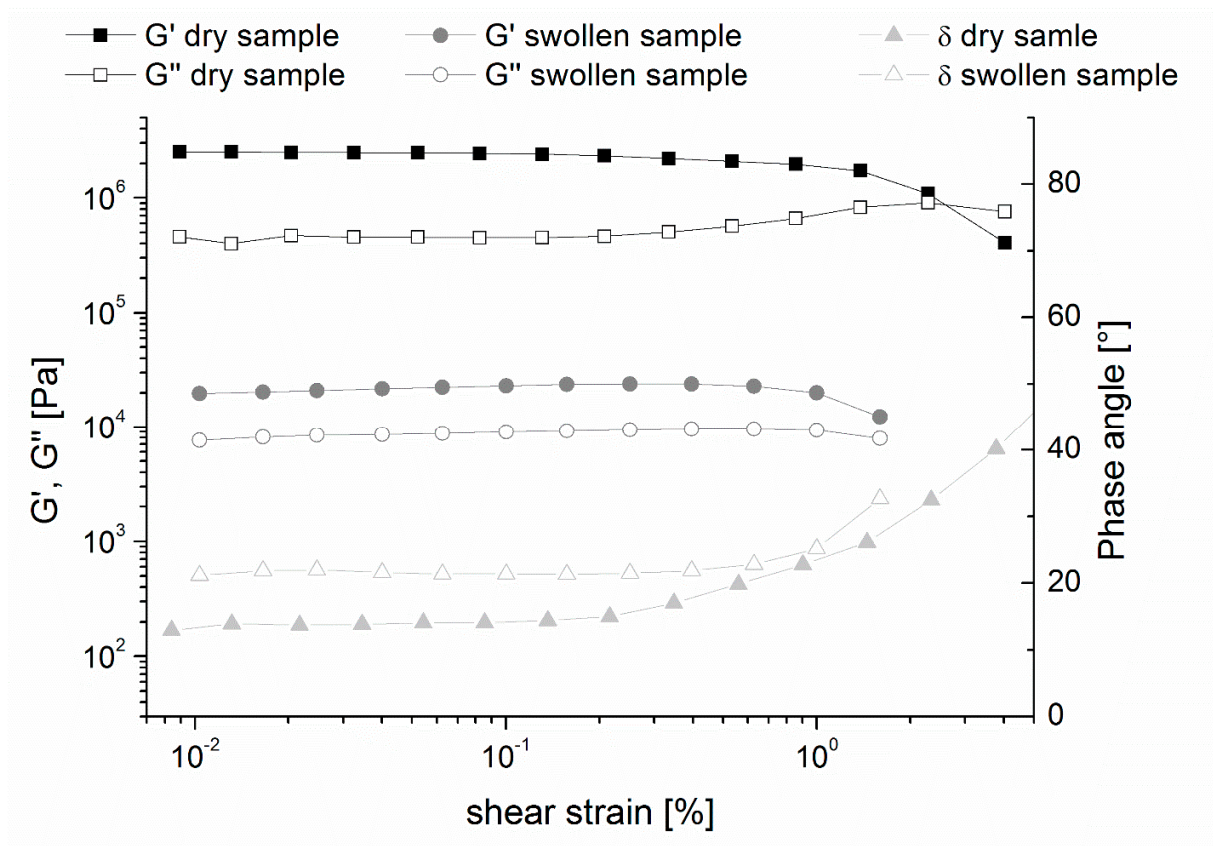

**Figure S2.** Impact of shear strain and buffer exposure (5 days of incubation in PBS at 37 °C) on the phase angle and the elastic ( $G'$ ) and loss ( $G''$ ) moduli of S100:S-PC-3 60:40.

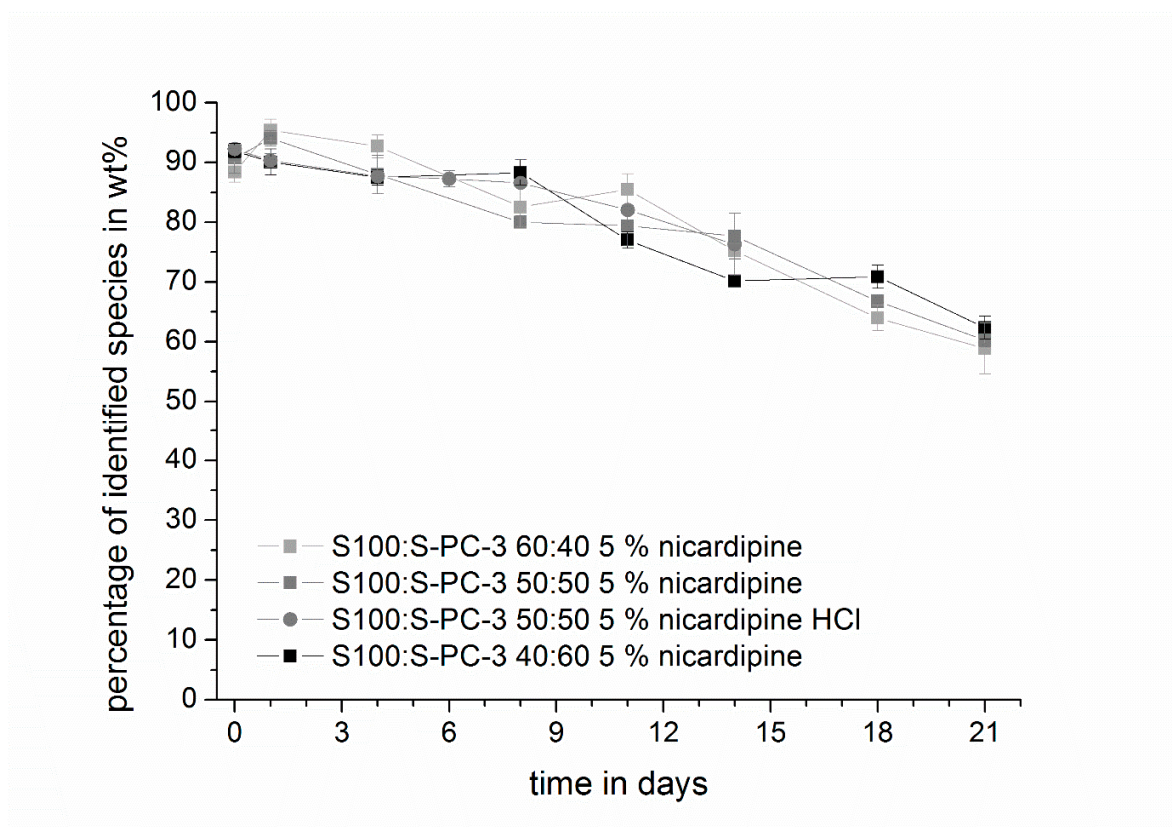

**Figure S4.** Percentage of identified species from total extrudate mass during release studies. Data are presented as mean  $\pm$  SD,  $n = 3$ .
